# Supplementary material
Source: PubMed Central journal article supplement (PMC5798951)
Supplement: krnb-15-02-1409930-s013.pdf [file krnb-15-02-1409930-s013.pdf]

## McKinlay et al. Suppl Figure 2

|             | Library         | Reads acquired | Reads mapped | Percent mapped | Unique, non-rRNA | Percent unique, non-rRNA |
|-------------|-----------------|----------------|--------------|----------------|------------------|--------------------------|
| Nascent RNA | Col-O           | 122,430,770    | 78,553,786   | 64%            | 46,360,884       | 38%                      |
|             | <i>nrpd1-3</i>  | 120,989,174    | 84,478,400   | 70%            | 59,447,048       | 49%                      |
|             | <i>nrpe1-11</i> | 123,608,974    | 86,523,216   | 70%            | 64,830,960       | 52%                      |
| Nuclear RNA | Col-O           | 105,944,110    | 74,134,460   | 70%            | 57,626,421       | 54%                      |
|             | <i>nrpd1-3</i>  | 75,280,875     | 53,325,738   | 71%            | 44,609,286       | 59%                      |
|             | <i>nrpe1-11</i> | 98,004,168     | 69,178,201   | 71%            | 59,032,505       | 60%                      |
