# Supplementary material
Source: PubMed Central journal article supplement (PMC5798951)
Supplement: krnb-15-02-1409930-s014.pdf [file krnb-15-02-1409930-s014.pdf]

## McKinlay et al. Suppl Figure 1

| <b>GENE</b>             | <b>Cp<sub>biotin-UTP</sub></b> | <b>Cp<sub>UTP</sub></b> | <b>Fold enrichment =<br/><math>2^{(Cp_{UTP}-Cp_{biotin-UTP})}</math></b> |
|-------------------------|--------------------------------|-------------------------|--------------------------------------------------------------------------|
| <b>5'ETS (45S rRNA)</b> | 20.2                           | 26.9                    | 100.43                                                                   |
| <b>LHCB1.3</b>          | 26.3                           | 33.5                    | 144.01                                                                   |
| <b>PSAD1</b>            | 28.8                           | 39.6                    | 1820.35                                                                  |
| <b>LHCB6</b>            | 30.1                           | 38.3                    | 292.71                                                                   |
| <b>ACT2</b>             | 33.1                           | 39.6                    | 478.82                                                                   |
| <b>RBSC2B</b>           | 33.3                           | 37.2                    | 15.93                                                                    |
| <b>AT2G45180.1</b>      | 33.3                           | 40.0                    | 106.4                                                                    |
| <b>DRT112</b>           | 34.1                           | 38.8                    | 24.76                                                                    |

Average Cp values correspond to the average cross-point values from triplicate NRO reactions
