# Supplementary material
Source: PubMed Central journal article supplement (PMC5798951)

McKinlay et al. Suppl Figure 14

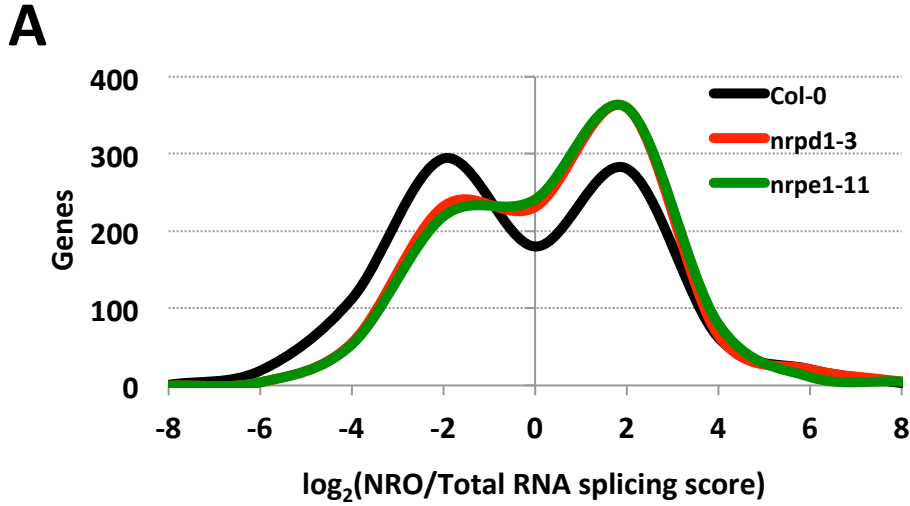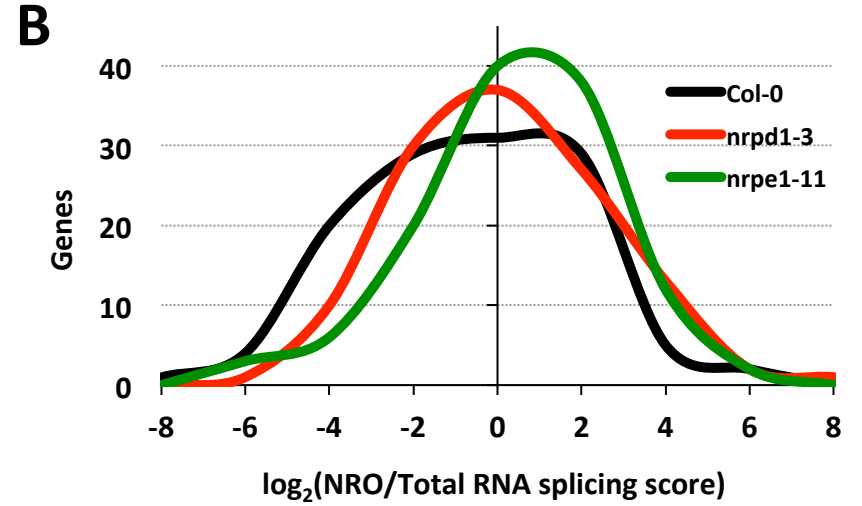

Supplement: krnb-15-02-1409930-s001.pdf [file krnb-15-02-1409930-s001.pdf]

# McKinlay et al. Suppl Figure 13

## *RNAP V* CHIP-seq

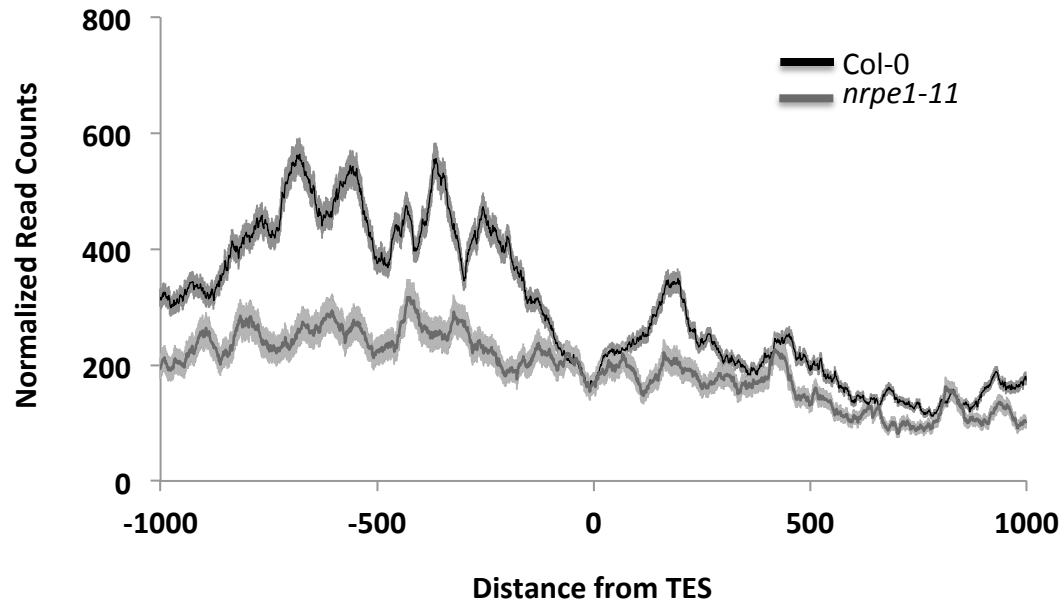

Supplement: krnb-15-02-1409930-s002.pdf [file krnb-15-02-1409930-s002.pdf]

# McKinlay et al. Suppl Figure 12

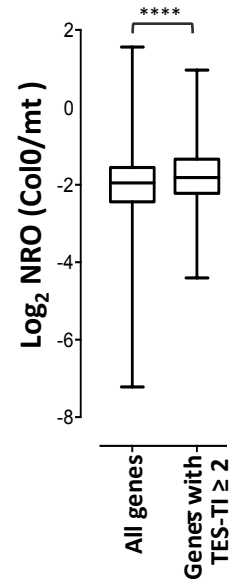

Supplement: krnb-15-02-1409930-s003.pdf [file krnb-15-02-1409930-s003.pdf]

# McKinlay et al. Suppl Figure 11

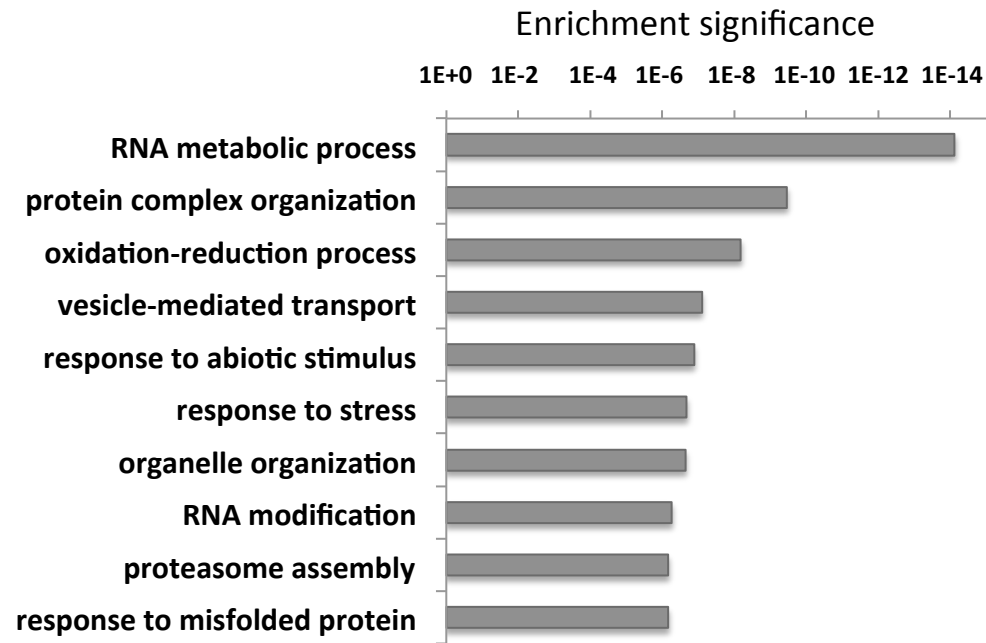

Supplement: krnb-15-02-1409930-s004.pdf [file krnb-15-02-1409930-s004.pdf]

# McKinlay et al. Suppl Figure 10

## A

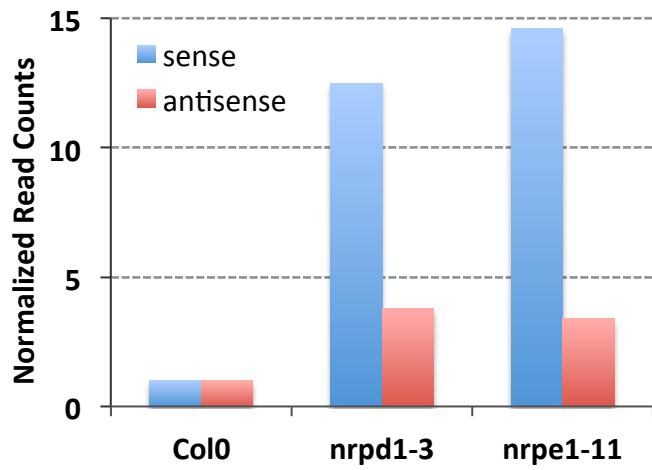

## B

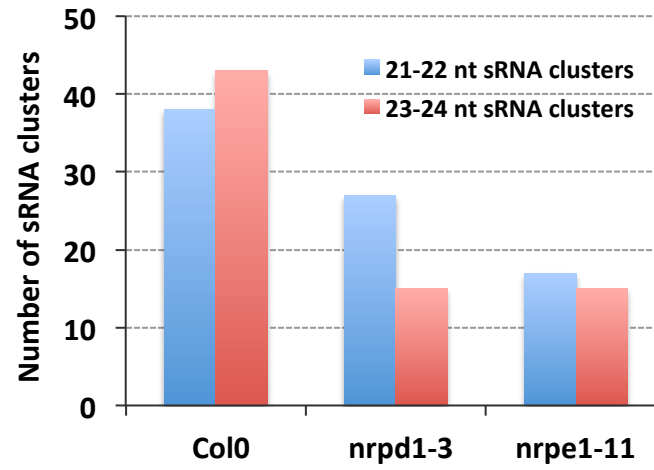

## C

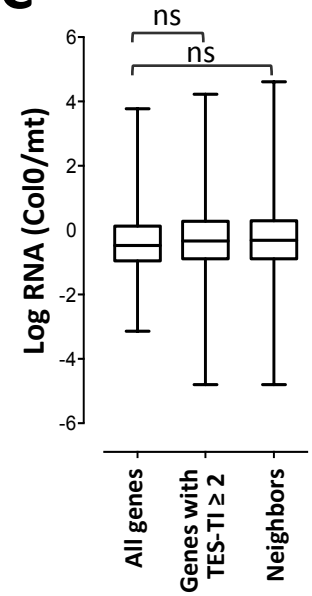

Supplement: krnb-15-02-1409930-s005.pdf [file krnb-15-02-1409930-s005.pdf]

# McKinlay et al. Suppl Figure 9

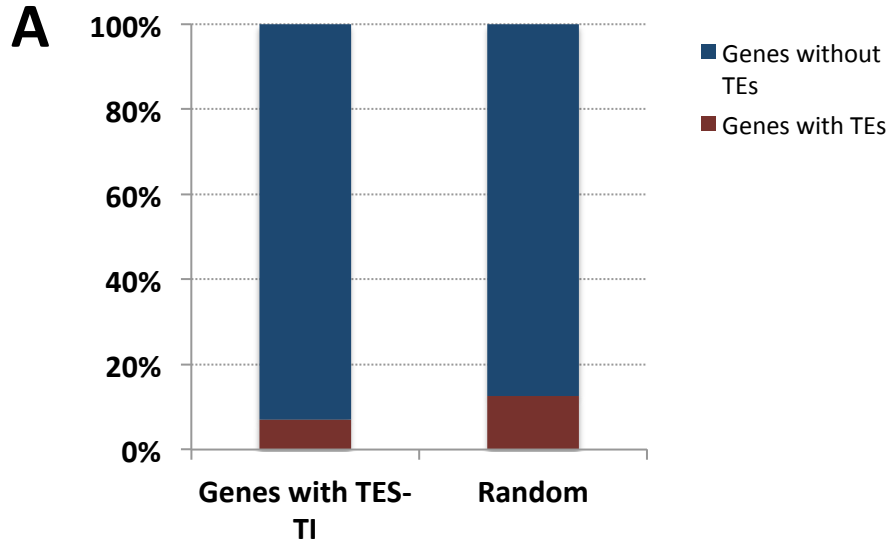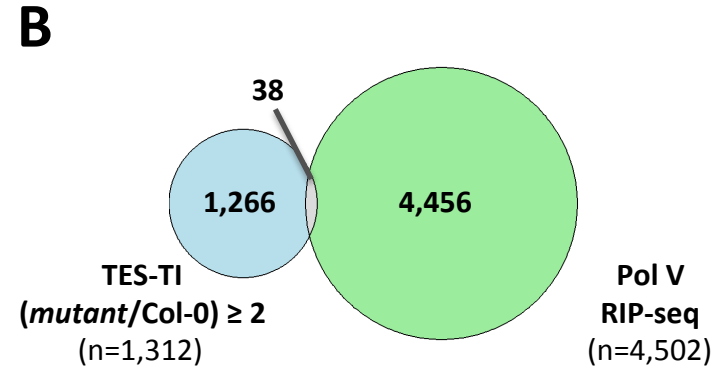

Supplement: krnb-15-02-1409930-s006.pdf [file krnb-15-02-1409930-s006.pdf]

# McKinlay et al. Suppl Figure 8

## A

Genes with TES-TI (mutant/Col-0)  $\geq 2$  (n=1,312)

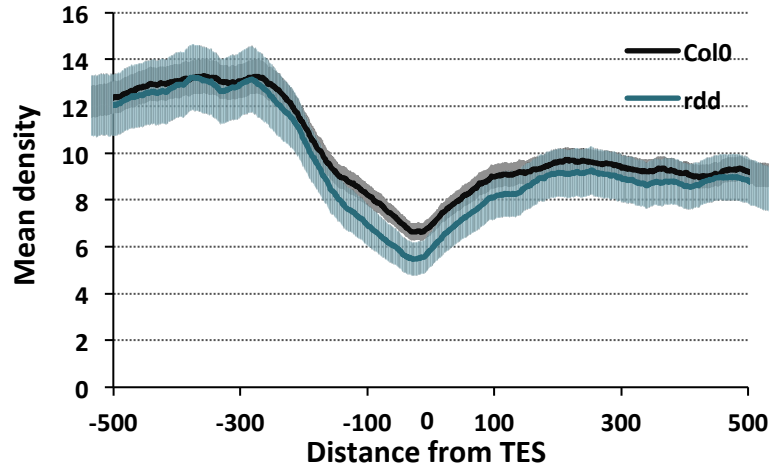

## B

Random set of genes (n=1,312)

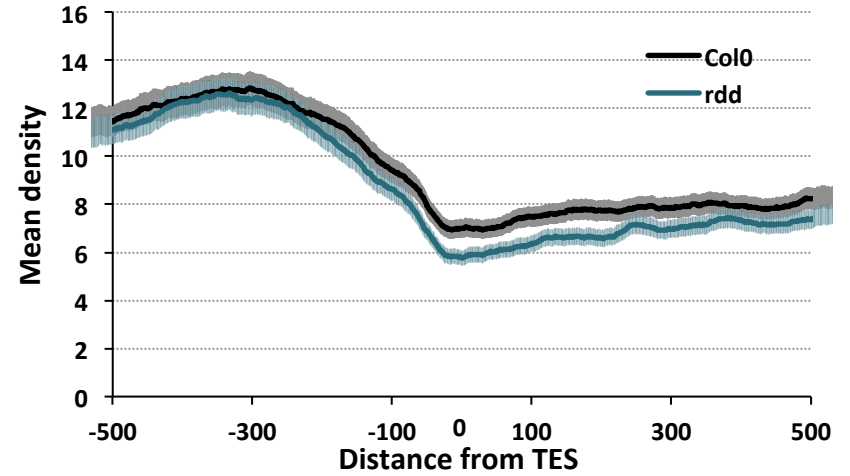

Supplement: krnb-15-02-1409930-s007.pdf [file krnb-15-02-1409930-s007.pdf]

# McKinlay et al. Suppl Figure 7

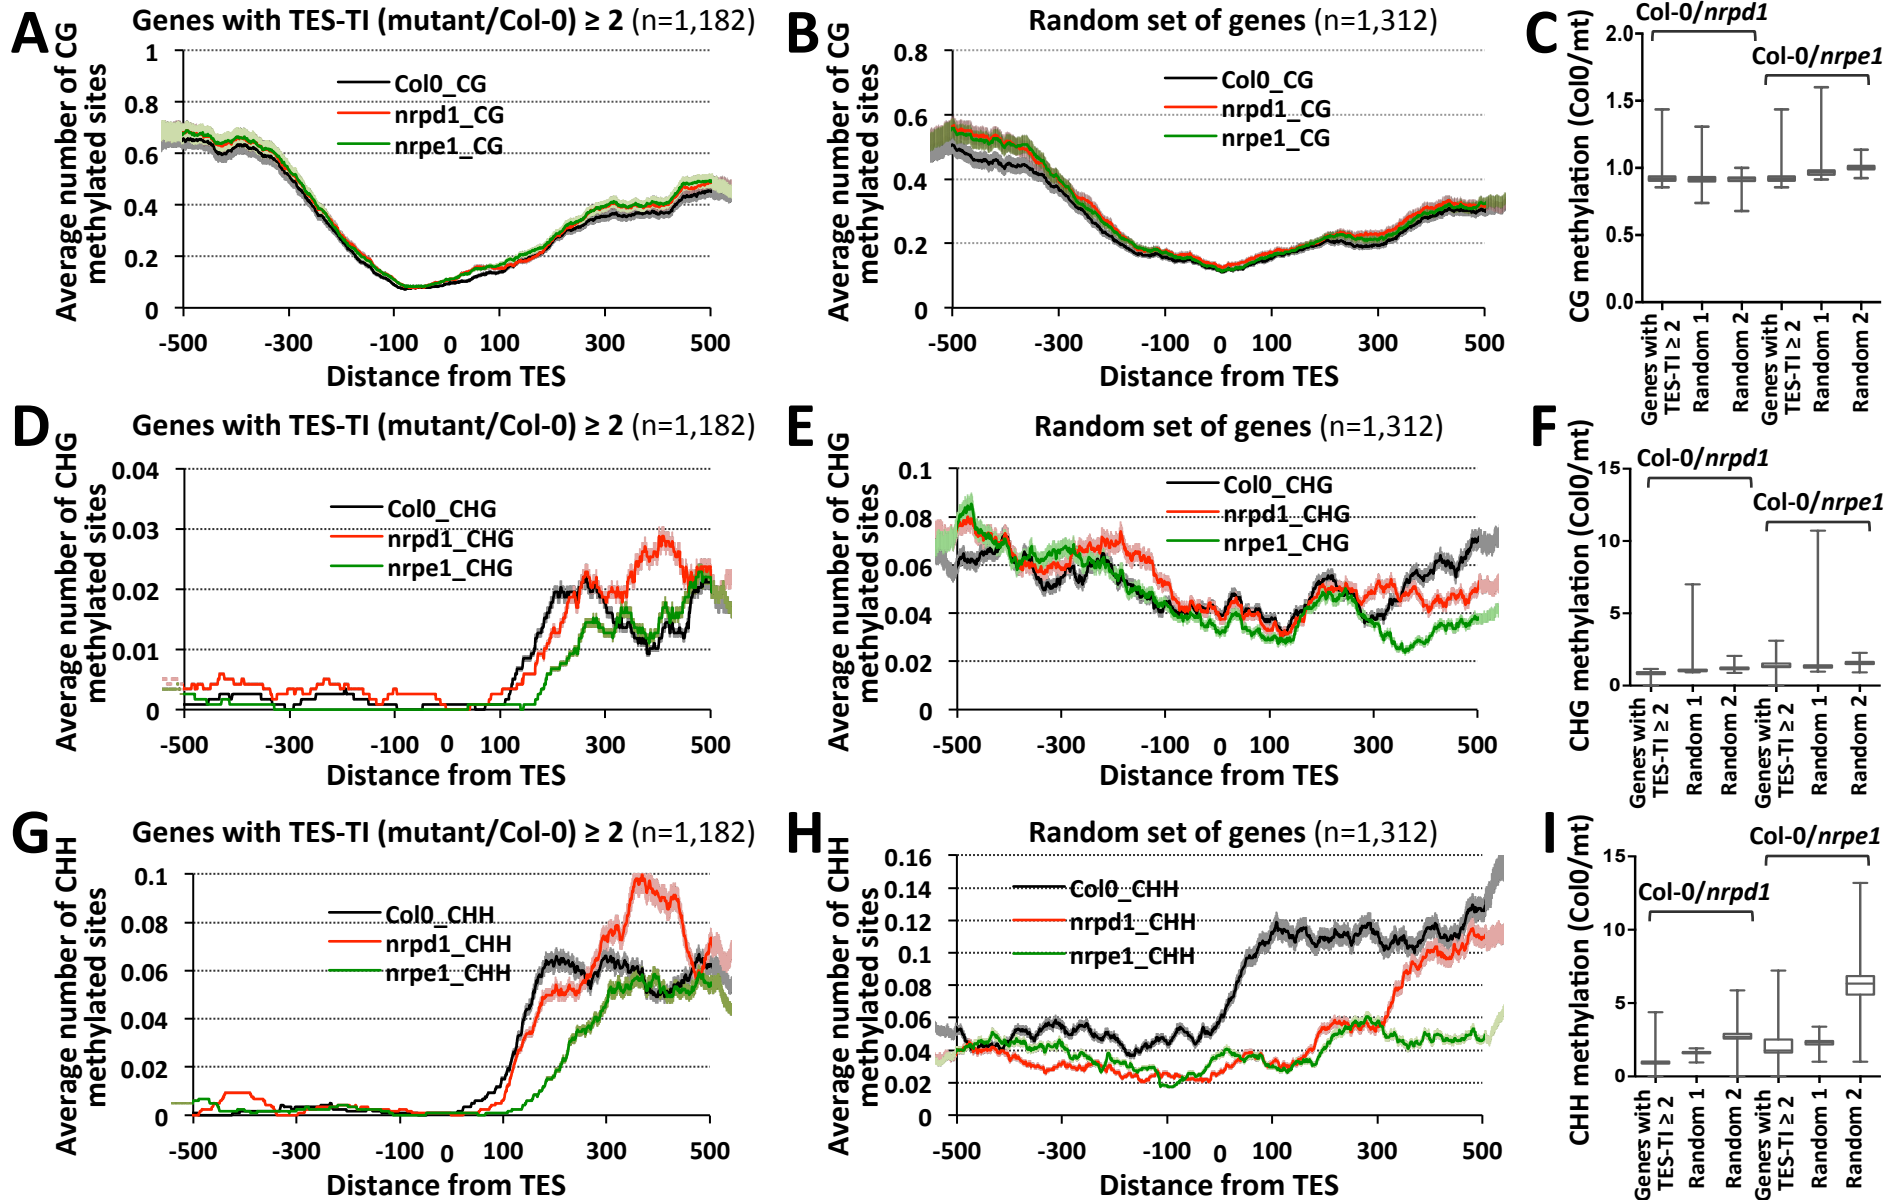

Supplement: krnb-15-02-1409930-s008.pdf [file krnb-15-02-1409930-s008.pdf]

# McKinlay et al. Suppl Figure 6

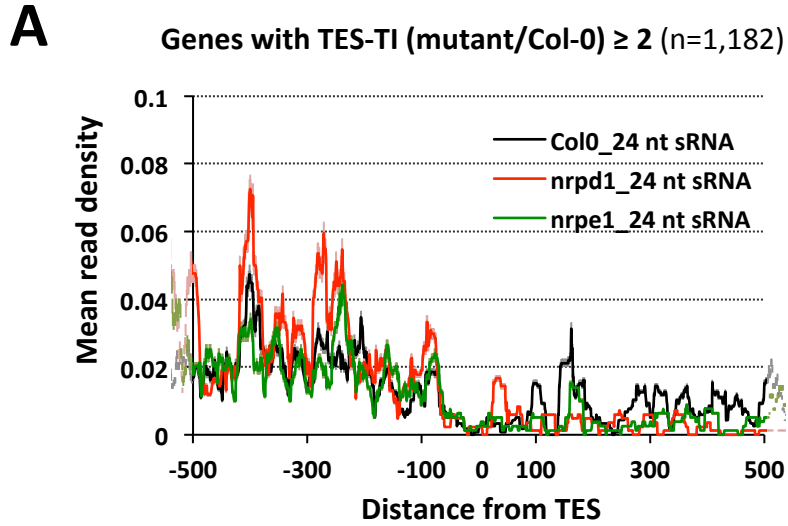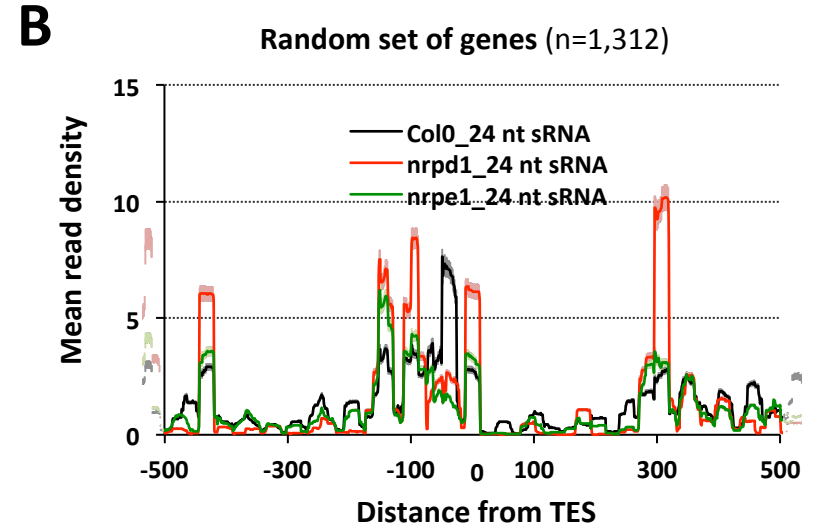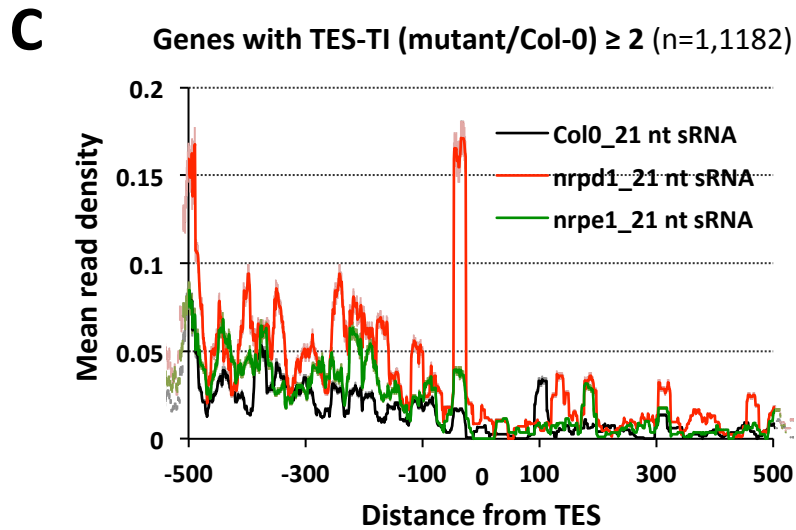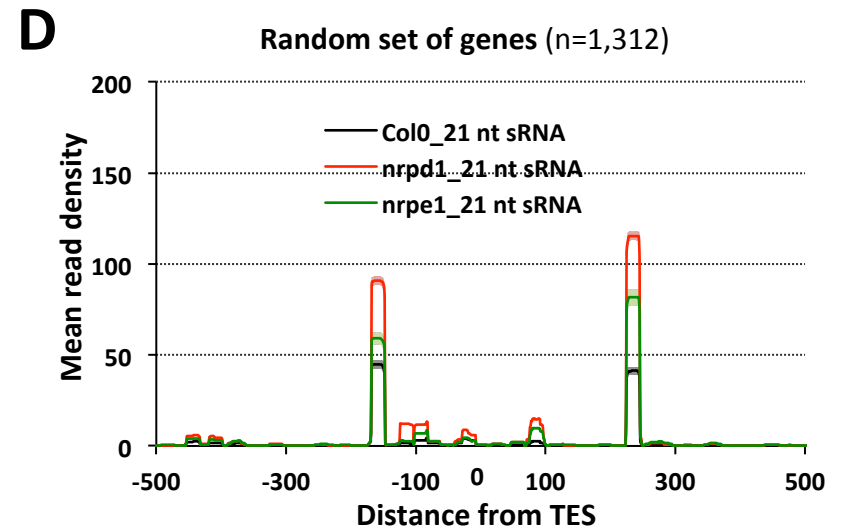

Supplement: krnb-15-02-1409930-s009.pdf [file krnb-15-02-1409930-s009.pdf]

## McKinlay et al. Suppl Figure 5

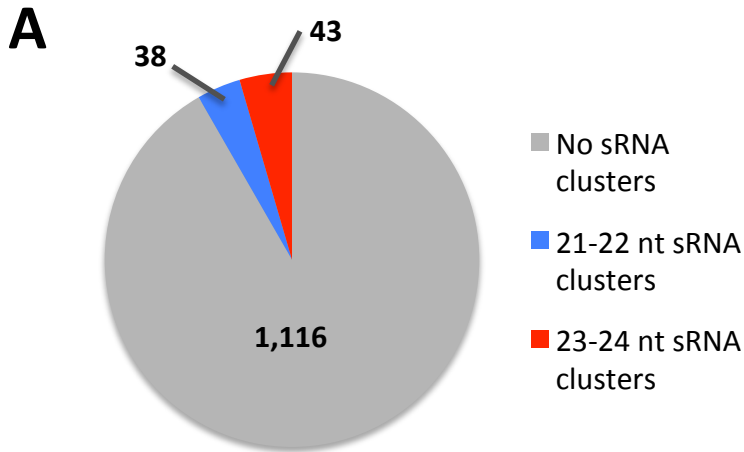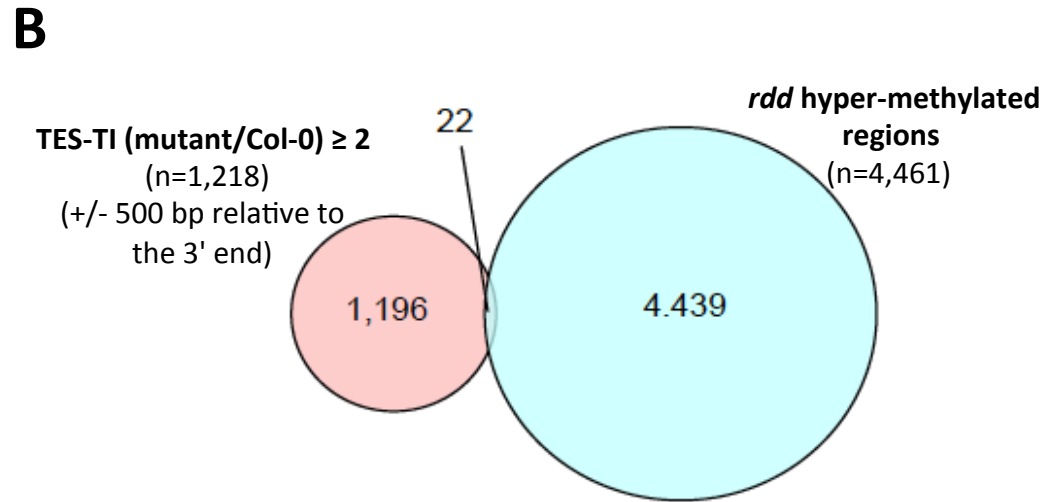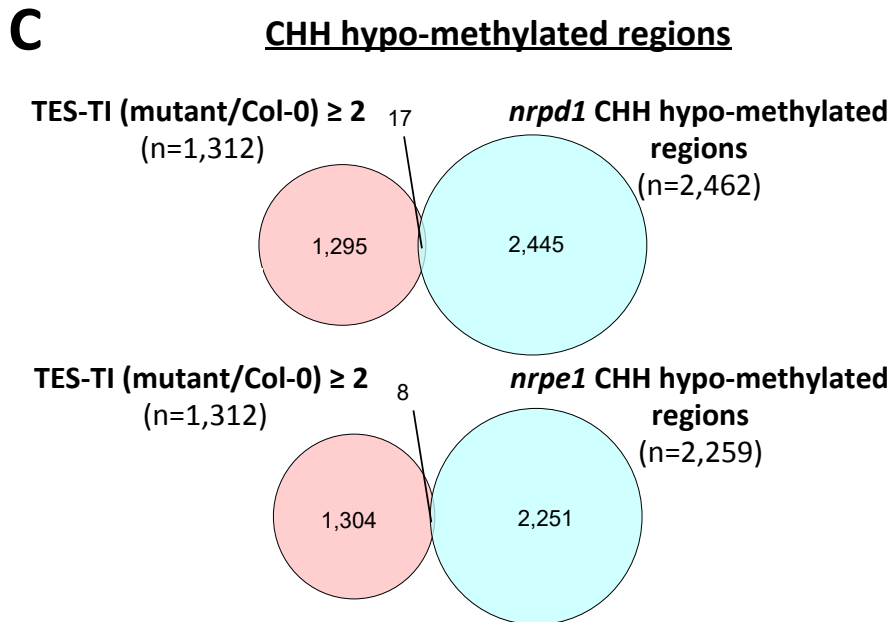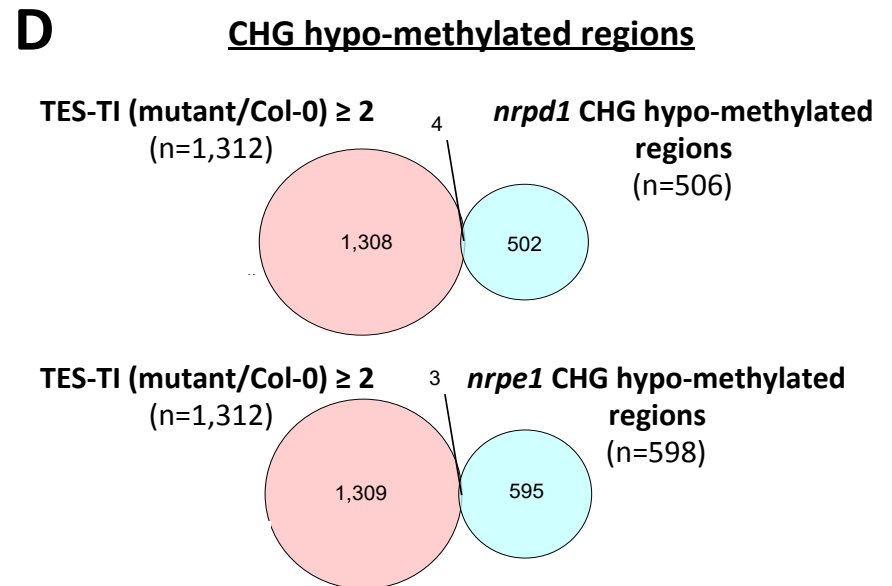

Supplement: krnb-15-02-1409930-s010.pdf [file krnb-15-02-1409930-s010.pdf]

# McKinlay et al. Suppl Figure 4

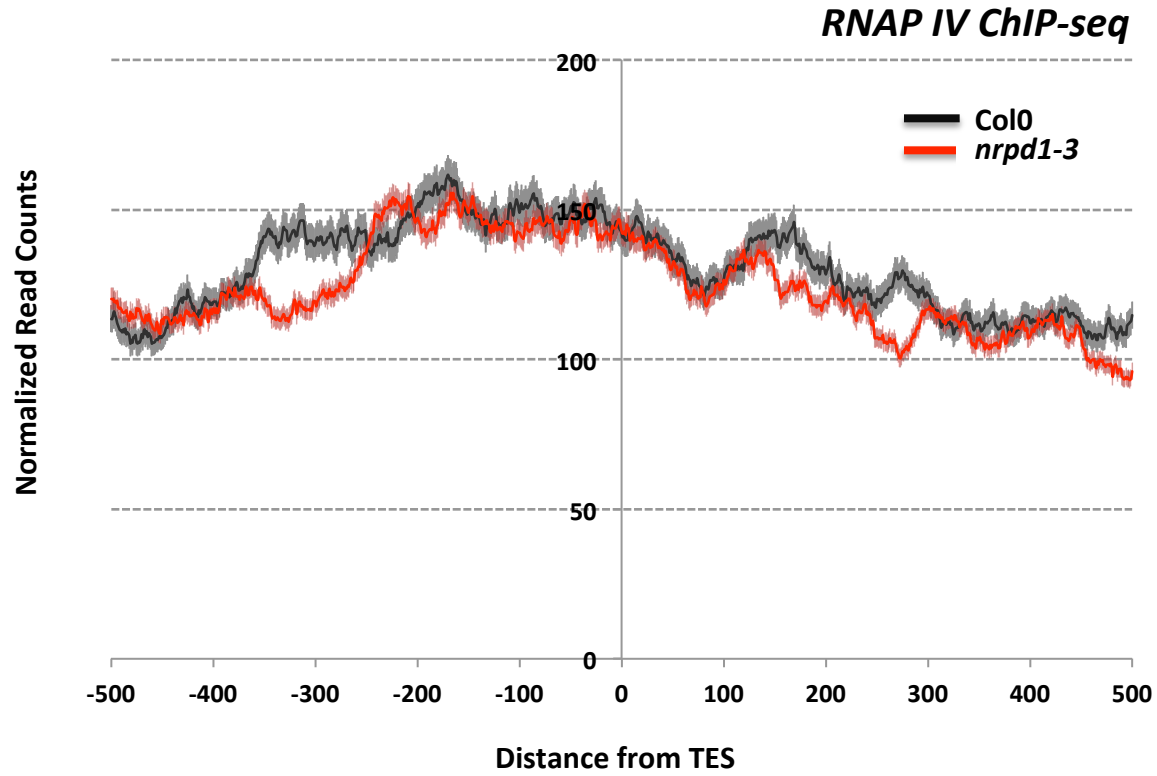

Supplement: krnb-15-02-1409930-s011.pdf [file krnb-15-02-1409930-s011.pdf]

# McKinlay et al. Suppl Figure 3

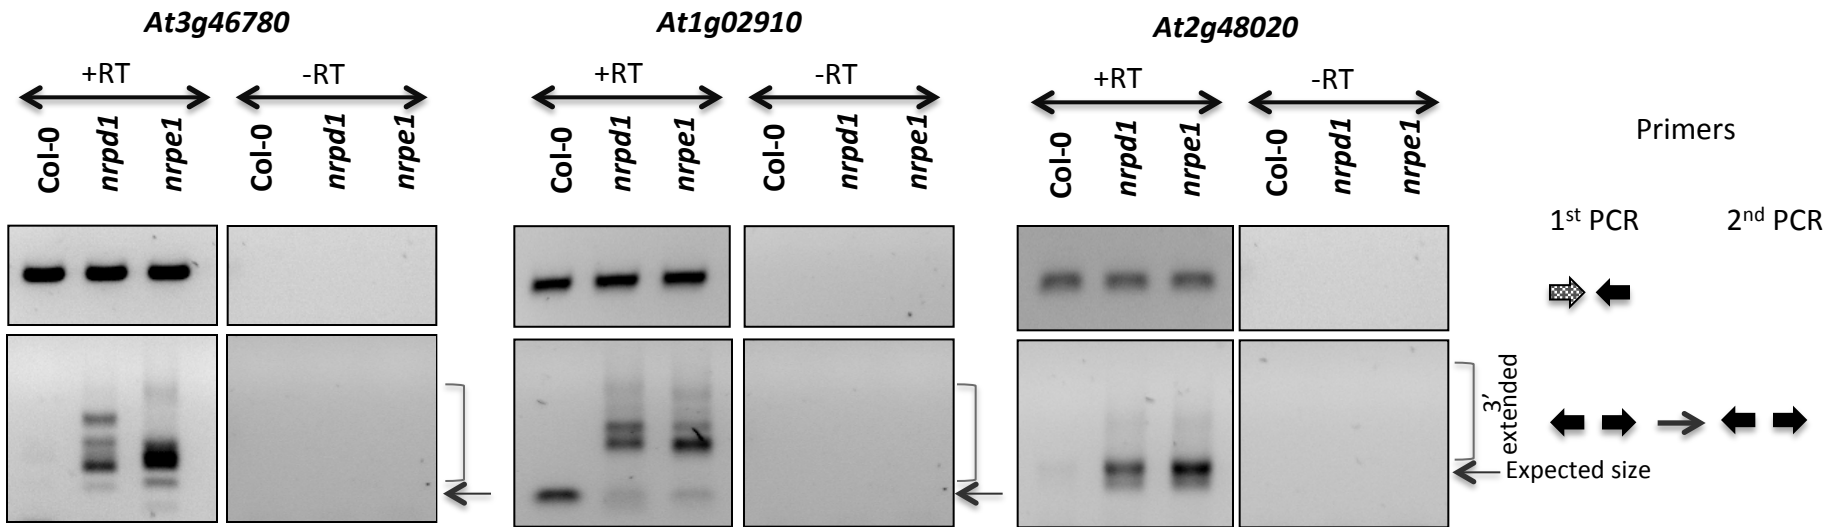

Supplement: krnb-15-02-1409930-s012.pdf [file krnb-15-02-1409930-s012.pdf]
